# Supplementary material
Source: PubMed Central journal article supplement (PMC5441241)
Supplement: NIHMS863089-supplement-1.pdf [file NIHMS863089-supplement-1.pdf]

**A**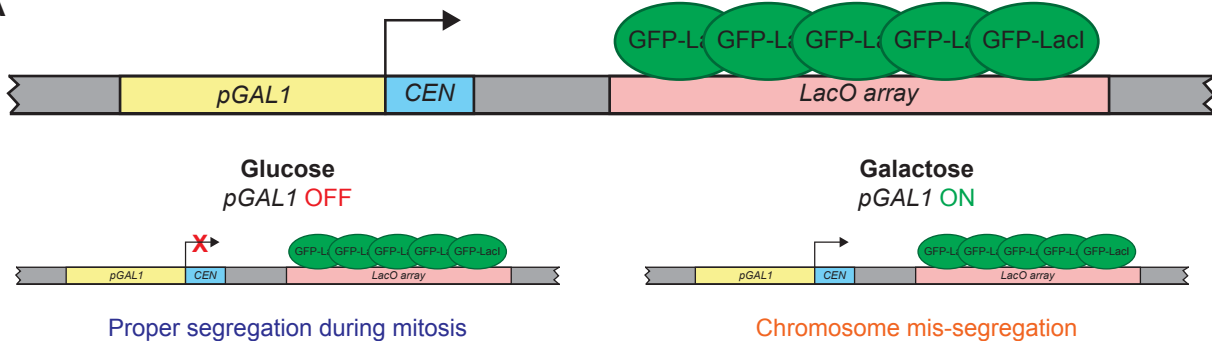**B Colony size measurements and mis-segregation rates for inducible aneuploidies**

| Inducible Chromosome(s) | ORFs | Percent Mis-segregation* | Disome / Euploid Colony Area |       |    | Trisome / Euploid Colony Area |       |    | Monosome / Euploid Colony Area |       |    |
|-------------------------|------|--------------------------|------------------------------|-------|----|-------------------------------|-------|----|--------------------------------|-------|----|
|                         |      |                          | Mean                         | SD**  | n  | Mean                          | SD**  | n  | Mean                           | SD**  | n  |
| 1                       | 117  | 86                       | 0.837                        | 0.086 | 14 | 1.012                         | 0.029 | 16 | 0.793                          | 0.020 | 16 |
| 2                       | 456  | 76                       | 0.844                        | 0.045 | 22 | 0.997                         | 0.052 | 25 | 0.000                          | 0.000 | 25 |
| 3                       | 183  | 73                       | 0.941                        | 0.063 | 15 | 1.112                         | 0.047 | 20 | 0.409                          | 0.035 | 20 |
| 4                       | 836  | 67                       | 0.060                        | 0.036 | 15 | 0.465                         | 0.102 | 26 | 0.001                          | 0.002 | 26 |
| 5                       | 323  | 73                       | 0.483                        | 0.036 | 18 | 0.908                         | 0.042 | 27 | 0.174                          | 0.016 | 27 |
| 6                       | 141  | 70                       | 0.000                        | 0.000 | 13 | 0.016                         | 0.025 | 19 | 0.629                          | 0.033 | 19 |
| 7                       | 583  | 70                       | 0.410                        | 0.085 | 10 | 0.885                         | 0.152 | 30 | 0.000                          | 0.000 | 30 |
| 8                       | 321  | 69                       | 0.795                        | 0.048 | 13 | 1.054                         | 0.036 | 25 | 0.081                          | 0.020 | 25 |
| 9                       | 241  | 83                       | 0.886                        | 0.041 | 22 | 1.059                         | 0.028 | 31 | 0.305                          | 0.023 | 31 |
| 10                      | 398  | 86                       | 0.669                        | 0.047 | 19 | 0.899                         | 0.035 | 22 | 0.000                          | 0.000 | 22 |
| 11                      | 348  | 77                       | 0.770                        | 0.040 | 23 | 0.936                         | 0.048 | 29 | 0.019                          | 0.004 | 29 |
| 12                      | 578  | 93                       | 0.111                        | 0.041 | 21 | 0.800                         | 0.056 | 27 | 0.001                          | 0.005 | 27 |
| 13                      | 505  | 80                       | 0.466                        | 0.050 | 22 | 0.962                         | 0.046 | 28 | 0.000                          | 0.000 | 28 |
| 14                      | 435  | 70                       | 0.392                        | 0.042 | 18 | 0.883                         | 0.029 | 24 | 0.001                          | 0.001 | 24 |
| 16                      | 511  | 82                       | 0.540                        | 0.032 | 24 | 0.913                         | 0.059 | 26 | 0.000                          | 0.000 | 26 |
| 1+2                     | 573  | NA                       | NA                           | NA    | NA | 0.880                         | 0.095 | 12 | 0.000                          | 0.000 | 12 |
| 5+10                    | 721  | NA                       | NA                           | NA    | NA | 0.744                         | 0.058 | 8  | 0.010                          | 0.003 | 8  |
| 2+5+10                  | 1177 | NA                       | NA                           | NA    | NA | 0.656                         | 0.076 | 18 | 0.000                          | 0.000 | 18 |
| 1+5+10                  | 838  | NA                       | NA                           | NA    | NA | 0.762                         | 0.043 | 9  | 0.012                          | 0.011 | 9  |
| 1+2+10                  | 971  | NA                       | NA                           | NA    | NA | 0.759                         | 0.114 | 14 | 0.000                          | 0.000 | 14 |

\* Percent mis-segregation calculated in haploid strains (disomes)

\*\* SD = standard deviation

NA = not analyzed

**C Mis-segregation rates of chromosomes IV and V in inducible aneuploidies**

| Inducible Chromosome | ORFs | Percent ChrIV Mis-segregation (3 hours) | Percent ChrIV Mis-segregation (5 hours) | Percent ChrV Mis-segregation (3 hours) | Percent ChrV Mis-segregation (5 hours) |
|----------------------|------|-----------------------------------------|-----------------------------------------|----------------------------------------|----------------------------------------|
| 1                    | 117  | 0                                       | 0                                       | 1                                      | 0                                      |
| 2                    | 456  | 0                                       | 0                                       | 0                                      | 0                                      |
| 8                    | 321  | 0                                       | 0                                       | 0                                      | 0                                      |
| 9                    | 241  | 0                                       | 0                                       | 0                                      | 1                                      |
| 11                   | 348  | 0                                       | 0                                       | 0                                      | 0                                      |
| 13                   | 505  | 0                                       | 0                                       | 0                                      | 0                                      |

Chr = chromosome
