# Supplementary material
Source: PubMed Central journal article supplement (PMC5441241)
Supplement: NIHMS863089-supplement-10.pdf [file NIHMS863089-supplement-10.pdf]

| Strain   | Galactose |        |        |        | Heat shock |          |        |          | DTT   |          |        |          |
|----------|-----------|--------|--------|--------|------------|----------|--------|----------|-------|----------|--------|----------|
|          | Mean      | p      | SD     | p      | Mean       | p        | SD     | p        | Mean  | p        | SD     | p        |
| WT       | 3.224     | 1.0000 | 0.1708 | 1.0000 | 2.423      | 1.0000   | 0.1156 | 1.0000   | 1.236 | 1.0000   | 0.1568 | 1.0000   |
| Dis I    | 3.205     | 0.8857 | 0.1666 | 0.8857 | 2.286      | 1.55E-04 | 0.1285 | 0.0104   | 1.457 | 2.12E-07 | 0.1617 | 0.2805   |
| Dis IX   | 3.186     | 0.8857 | 0.2414 | 0.0286 | 2.405      | 0.1605   | 0.1656 | 1.55E-04 | 1.192 | 0.0237   | 0.1856 | 2.12E-07 |
| Dis VIII | 3.165     | 0.4857 | 0.2329 | 0.0571 | 2.452      | 0.0499   | 0.2035 | 1.55E-04 | 1.287 | 0.0378   | 0.1538 | 0.2962   |
| Dis XI   | 3.236     | 0.8857 | 0.1772 | 0.8857 | 2.384      | 1.86E-03 | 0.1112 | 0.5737   | 1.408 | 3.97E-07 | 0.1555 | 0.4688   |
| Dis II   | 2.527     | 0.0286 | 0.2961 | 0.0286 | 2.275      | 1.55E-04 | 0.2355 | 1.55E-04 | 1.268 | 0.1785   | 0.1778 | 2.08E-06 |
| Dis XIII | 2.854     | 0.0286 | 0.3550 | 0.0286 | 2.342      | 1.55E-04 | 0.2309 | 1.55E-04 | 0.955 | 2.12E-07 | 0.1769 | 2.12E-07 |
| Dis XVI  | 3.217     | 1.0000 | 0.2277 | 0.0571 | 2.604      | 1.55E-04 | 0.1404 | 0.0281   | 1.321 | 1.13E-04 | 0.1985 | 1.44E-08 |
| Dis V    |           |        |        |        | 2.527      | 1.55E-04 | 0.2260 | 1.55E-04 | 0.976 | 1.44E-08 | 0.1794 | 1.89E-08 |
| Dis X    |           |        |        |        |            |          |        |          | 1.300 | 1.80E-03 | 0.1646 | 0.0425   |
| Dis XIV  |           |        |        |        |            |          |        |          | 1.069 | 6.29E-08 | 0.1845 | 2.48E-08 |
| Dis XII  |           |        |        |        |            |          |        |          | 1.094 | 4.78E-07 | 0.1942 | 2.48E-08 |

**Table S2. Related to Figure 6. The effects of aneuploidy on the mean and standard deviation of three reporter constructs.**

Strains containing an extra copy of chromosome I, II, V, VIII, IX, X, XI, XII, XIII, XIV, or XVI were monitored by single cell fluorescent reporters in galactose, heat shock, and/or DTT (Figure 6, Figure S6). Reporter levels were normalized by SSC as a proxy for cell size, scaled by an arbitrary factor of  $10^{3.5}$  for visualization purposes, and  $\log_{10}$ -transformed. Shading indicates statistically significant increase (red) or decrease (green) from WT ( $p < 0.05$ ) by Wilcoxon rank sum test.
