# Supplementary material
Source: PubMed Central journal article supplement (PMC5441241)
Supplement: NIHMS863089-supplement-13.pdf [file NIHMS863089-supplement-13.pdf]

**Table S5. Related to STAR Methods. Plasmids used to generate inducible aneuploid strains.**

| <b>Plasmid</b>                                    | <b>Target coordinates for integration of the LacO array</b> | <b>Restriction enzyme used to insert in intergenic region</b>                           | <b>Selectable marker for plasmid integration</b>                         | <b>Source</b>                |
|---------------------------------------------------|-------------------------------------------------------------|-----------------------------------------------------------------------------------------|--------------------------------------------------------------------------|------------------------------|
| 1801 (pDB030)<br><i>p<sub>URA3</sub>-GFP-LacI</i> | Targets GFP-LacI to <i>HIS3</i> on chromosome XV            | NheI to integrate at <i>HIS3</i> select for KAN (has <i>HIS3</i> and KANMX2 resistance) | KANMX2 (plasmid also has <i>HIS3</i> resistance)                         | Bressan et al., 2004         |
| 1499 (pCM40)                                      | For cloning – no targeting sequence                         | Cut with Sall to ligate in targeting insert                                             | NATMX6                                                                   | gift from Doug Koshland      |
| 2632 (Cen5-LacO)                                  | V: 152351-153293                                            | BamHI                                                                                   | NATMX6                                                                   | Miller et al., 2012          |
| 2627 (Cen1-LacO)                                  | I: 151624-152219                                            | BstZ17I                                                                                 | NATMX6                                                                   | This study                   |
| 2629 (Cen2-LacO)                                  | II: 238345-238923                                           | AflII                                                                                   | NATMX6                                                                   | This study                   |
| 2631 (Cen4-LacO)                                  | IV: 452513-453003                                           | AflII                                                                                   | NATMX6                                                                   | This study                   |
| 2634 (Cen8-LacO)                                  | VIII: 105718-106030                                         | BsrGI                                                                                   | NATMX6                                                                   | This study                   |
| 2636 (Cen10-LacO)                                 | X: 444903-445865                                            | PacI                                                                                    | NATMX6                                                                   | This study                   |
| 2638 (Cen11-LacO)                                 | XI: 439058-439732                                           | PmlI or BclI                                                                            | NATMX6                                                                   | This study                   |
| 2639 (Cen14-LacO)                                 | XIV: 624649-624953                                          | StuI                                                                                    | NATMX6                                                                   | This study                   |
| 2641 (HYGRO-LacO)                                 | Targets to hygromycin sequence                              | EagI (cuts twice in insert, cutting out a 165bp sequence)                               | NATMX6 (proper integration also confers loss of hygromycin B resistance) | This study                   |
| 1888 (pGAL-CEN-JC3-13)                            | -                                                           | -                                                                                       | URA3                                                                     | Anders et al., 2009          |
| 695 (pAG32)                                       | -                                                           | -                                                                                       | hphMX4                                                                   | Goldstein and McCusker, 1999 |
