# Supplementary material
Source: PubMed Central journal article supplement (PMC5441241)

**A**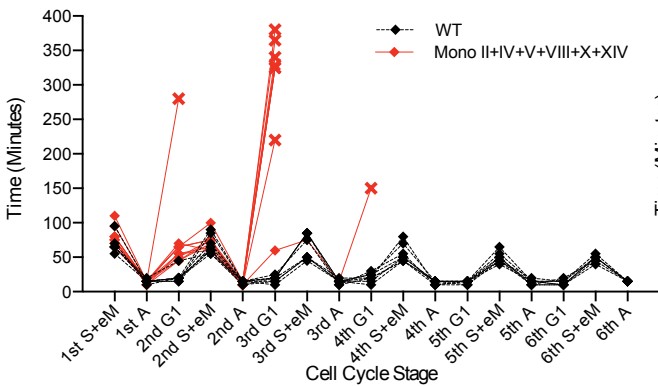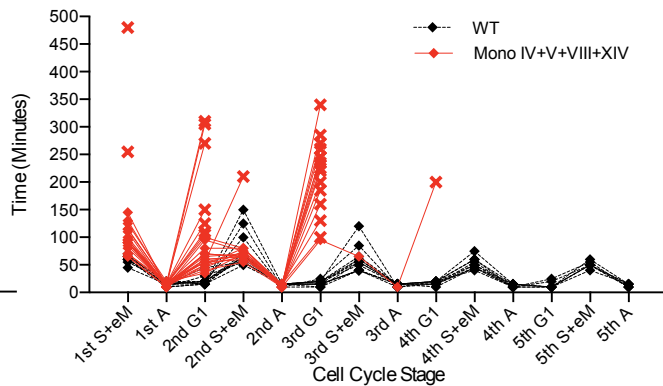**B**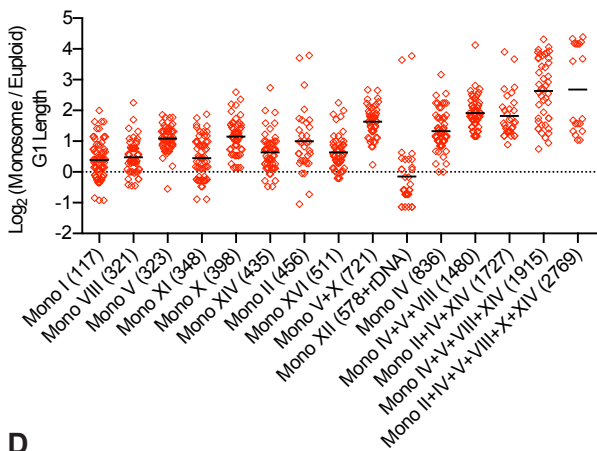**C**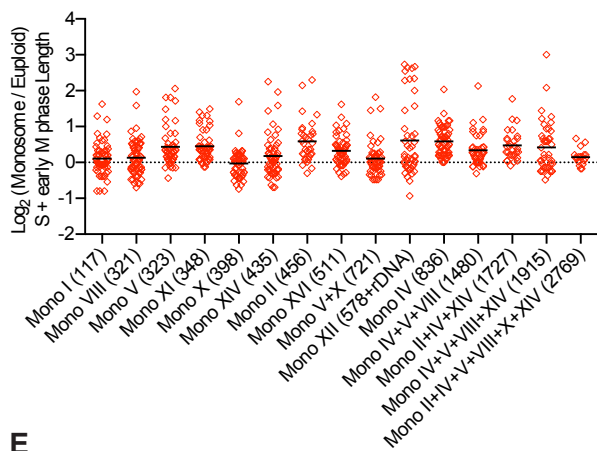**D**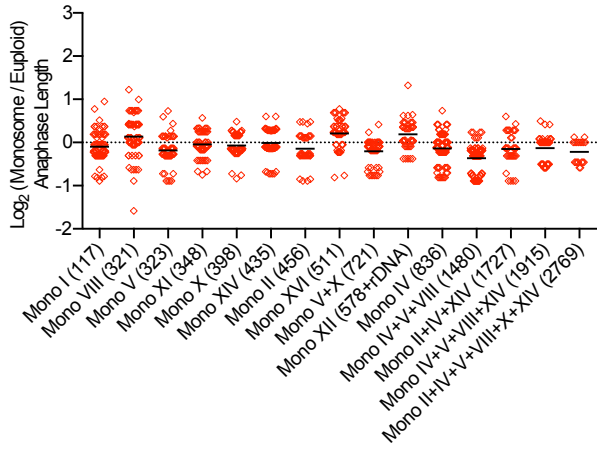**E**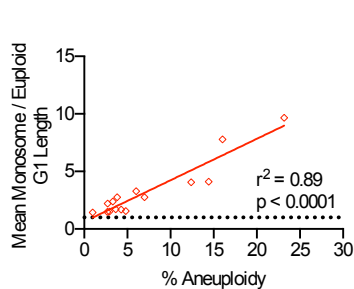

Supplement: NIHMS863089-supplement-2.pdf [file NIHMS863089-supplement-2.pdf]

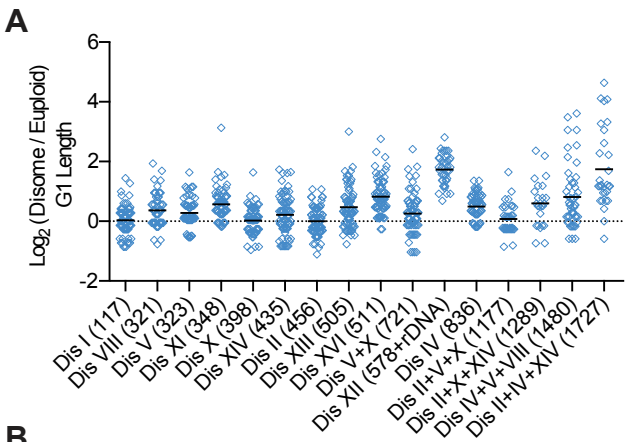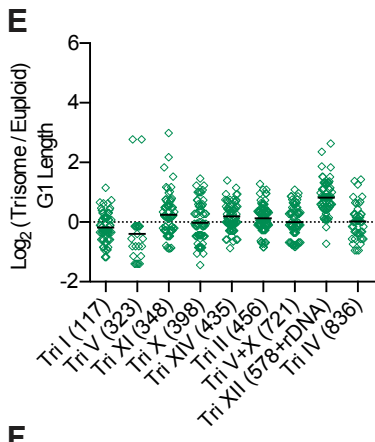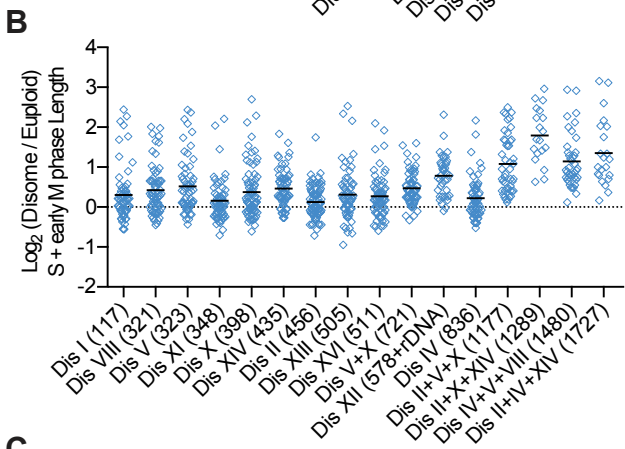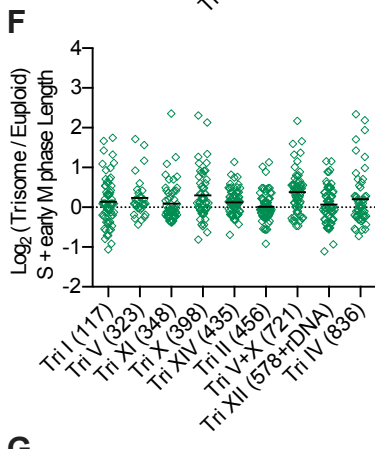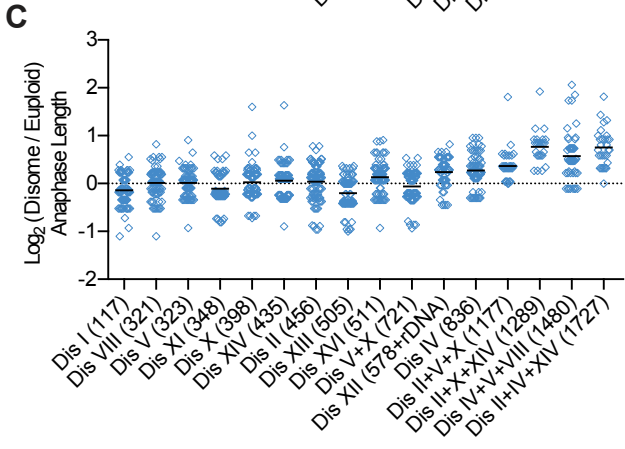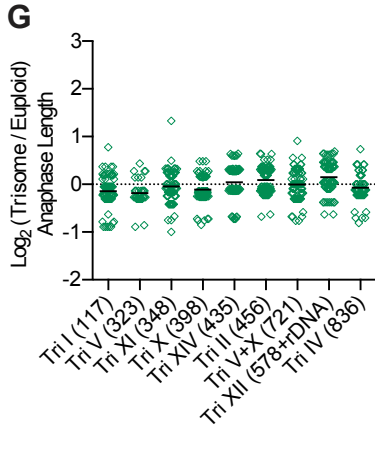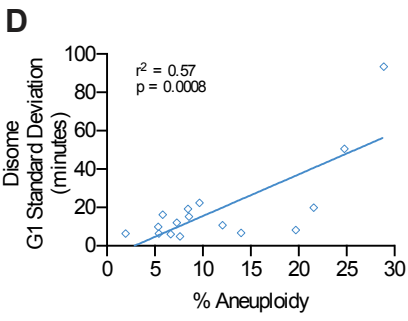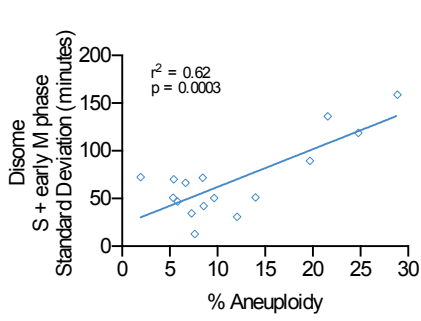

Supplement: NIHMS863089-supplement-3.pdf [file NIHMS863089-supplement-3.pdf]

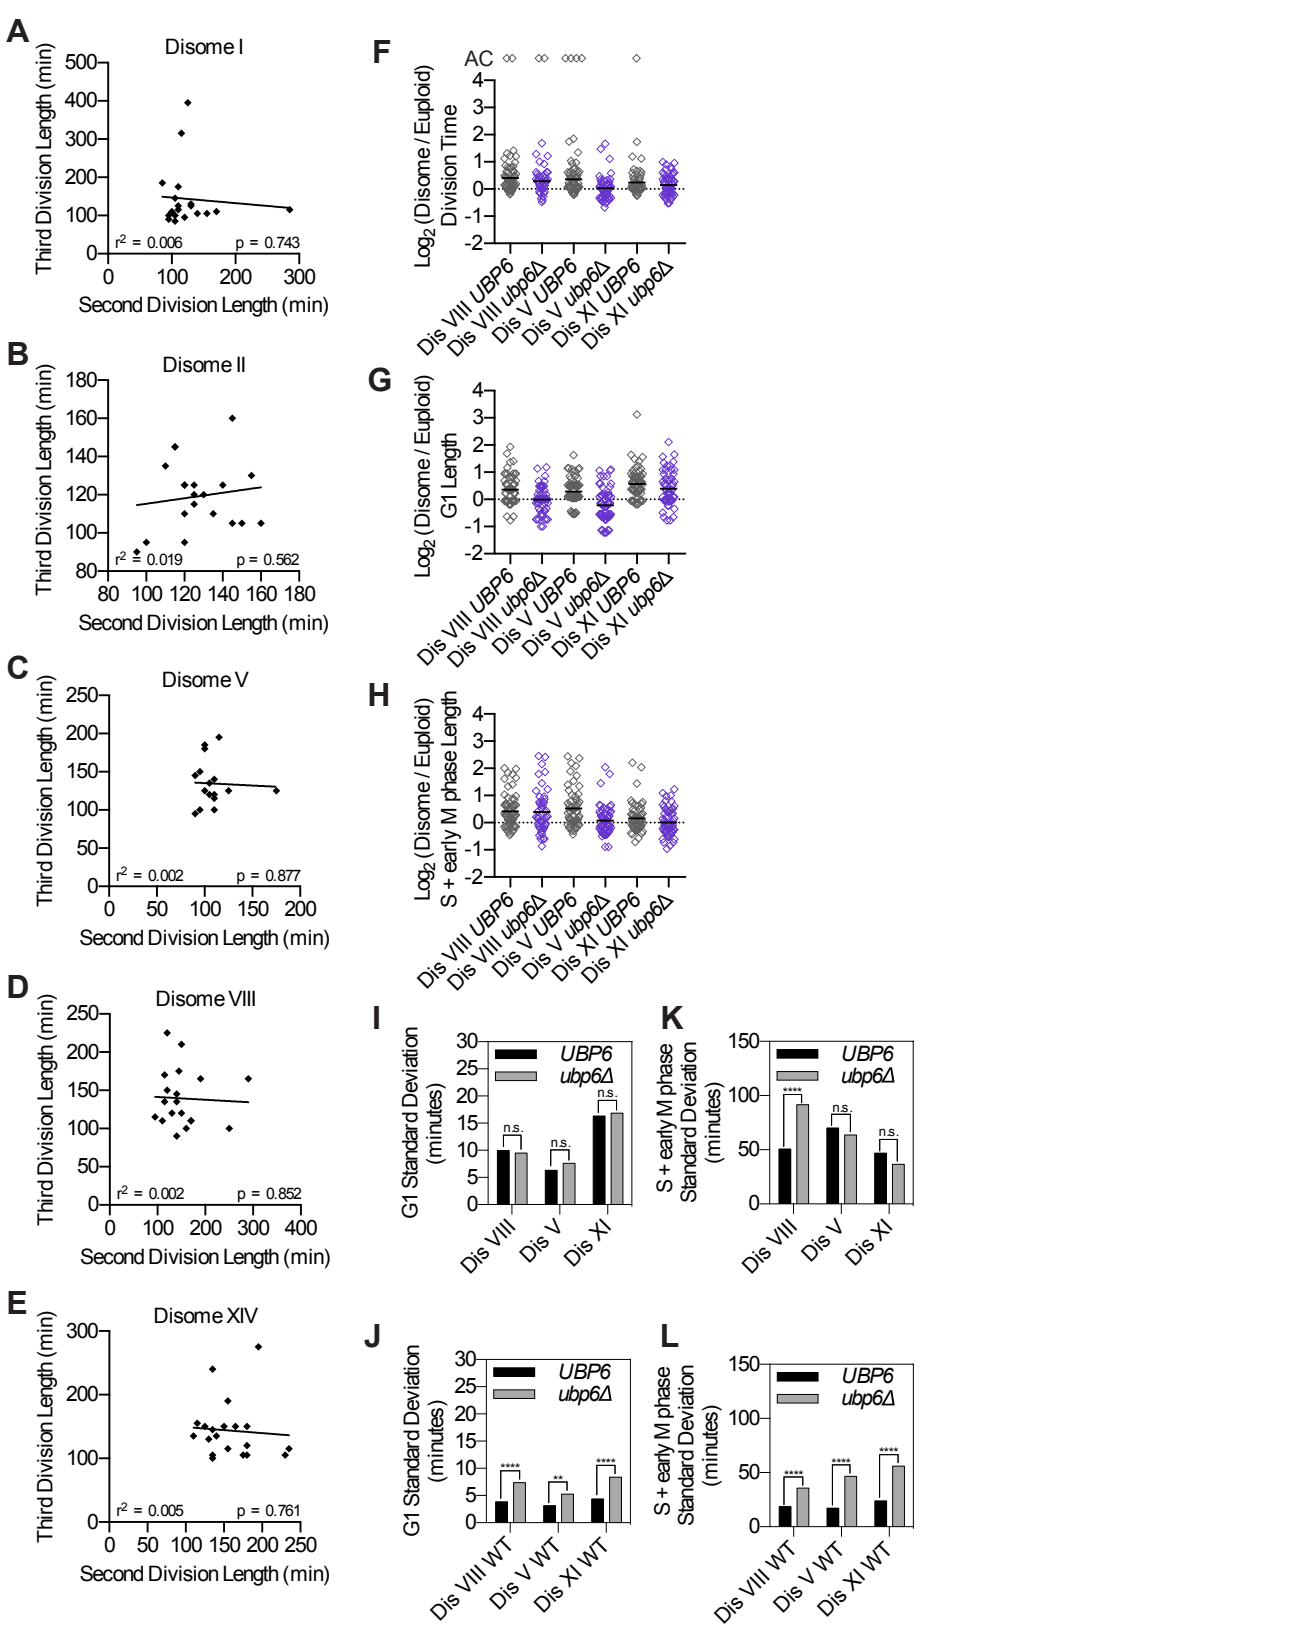

Supplement: NIHMS863089-supplement-4.pdf [file NIHMS863089-supplement-4.pdf]

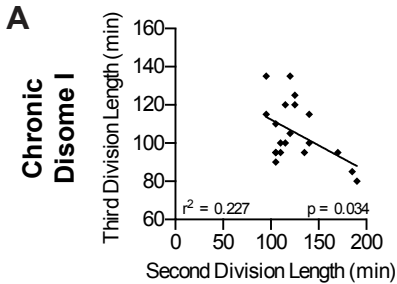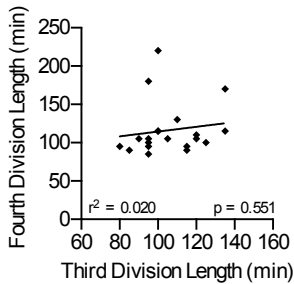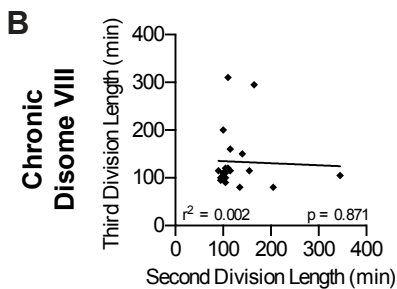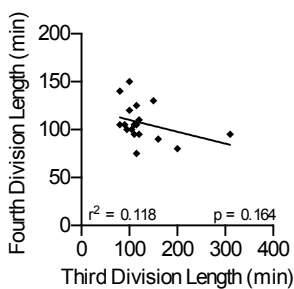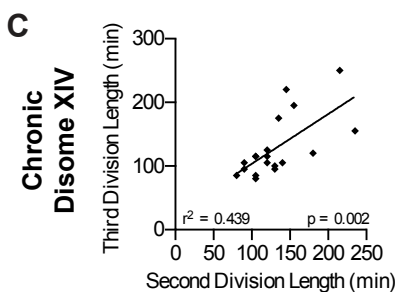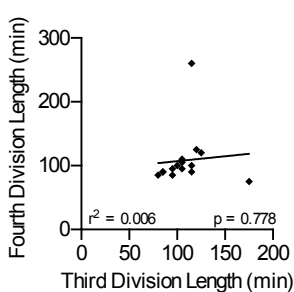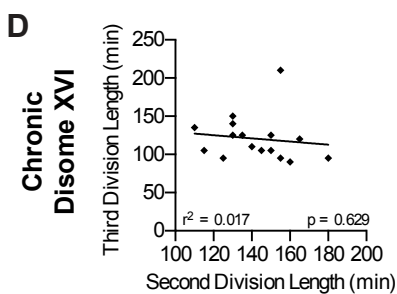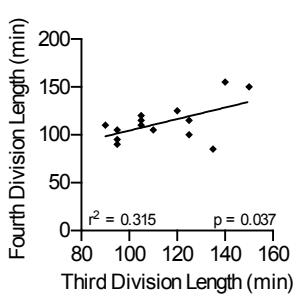

Supplement: NIHMS863089-supplement-5.pdf [file NIHMS863089-supplement-5.pdf]

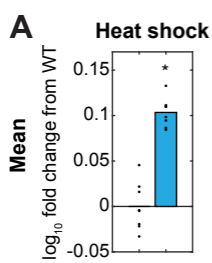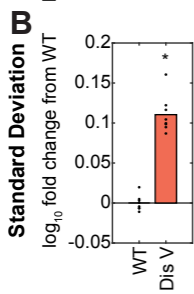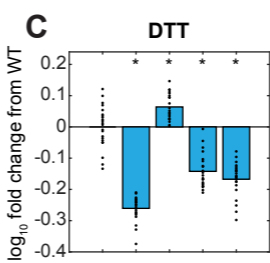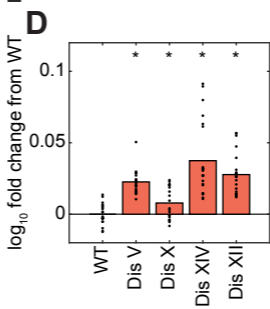

Supplement: NIHMS863089-supplement-6.pdf [file NIHMS863089-supplement-6.pdf]

**A**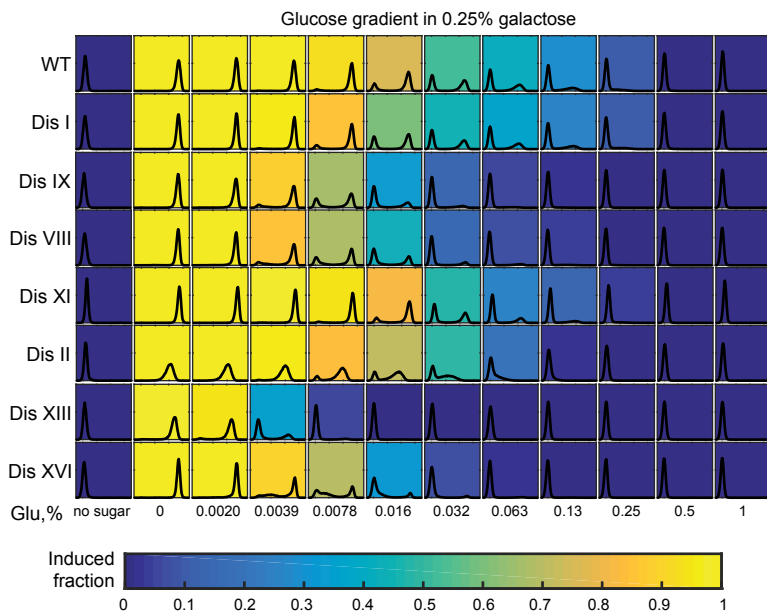**B**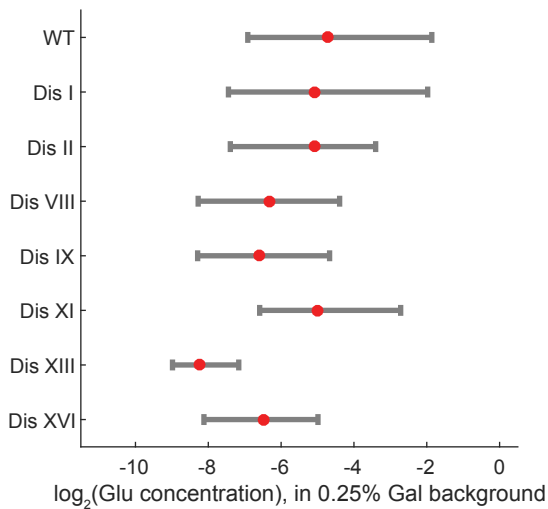**C**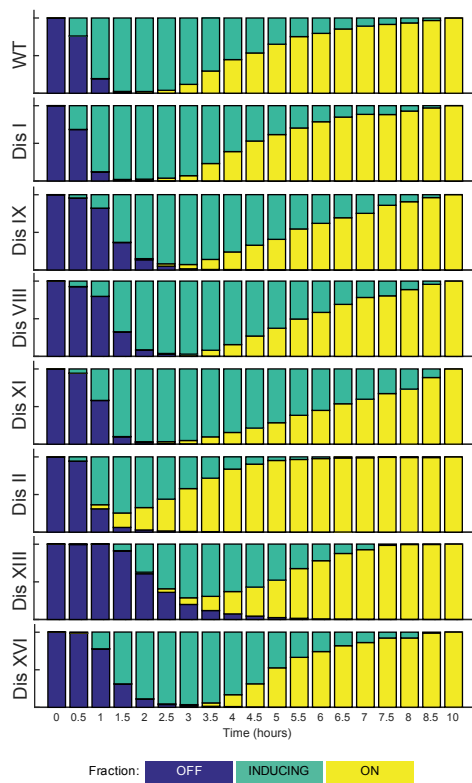**D**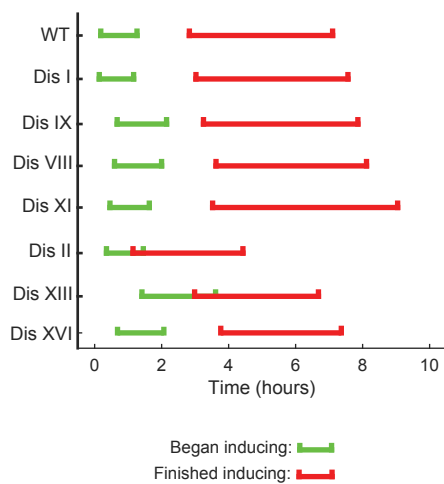

Supplement: NIHMS863089-supplement-7.pdf [file NIHMS863089-supplement-7.pdf]

## STEADY-STATE METRICS

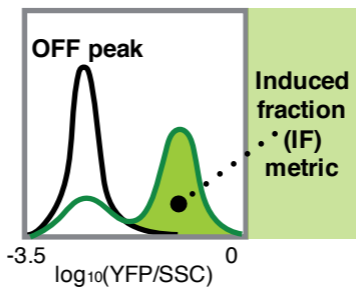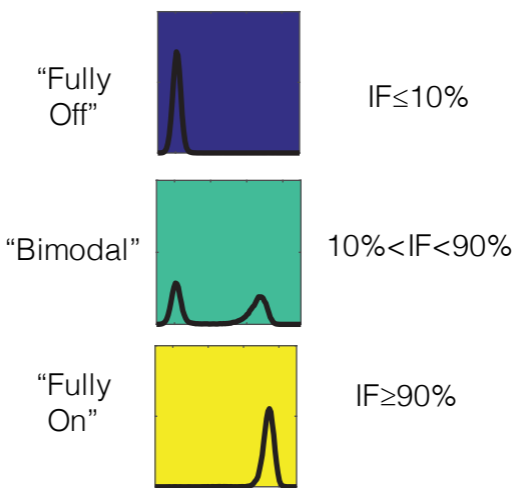

Decision threshold: concentration at which IF  $\geq 50\%$

## KINETIC METRICS

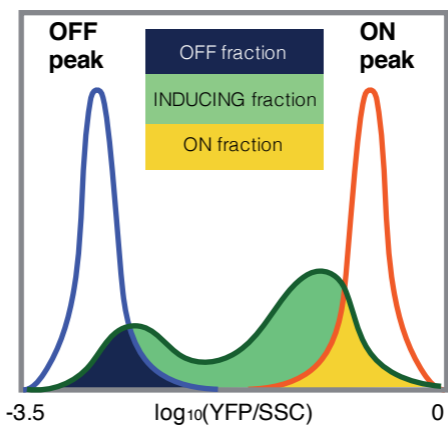

Supplement: NIHMS863089-supplement-8.pdf [file NIHMS863089-supplement-8.pdf]
